# Supplementary material for: Mutation in Wdr45 leads to early motor dysfunction and widespread aberrant axon terminals in a beta-propeller protein associated neurodegeneration (BPAN) patient-inspired mouse model
Source: Front Neurosci. 2025 Feb 28;19:1545004. doi: 10.3389/fnins.2025.1545004 (PMC11907653; doi:10.3389/fnins.2025.1545004)
Supplement: Supplementary file 11 [file Table_1.XLSX]

## Sheet: Antibodies
Antibody Target	Company	Product number	Dillution: Histology	Dillution: immunoblotting
WDR45	Protein Tech	19194-1-AP	N/A	1:1000
Tyrosine Hydroxylase (TH)	Pel-freez	pP40101-150	1:2000	N/A
Norepenephrine Transporter (NET)	Thermo-Fisher	CL3063	1:1000	N/A
Calbindin (CALB1)	Swant	CB38	1:5000	N/A
Parvalbumin (PV)	Swant	PV 25	1:3000	N/A
Calreticulin (CALR)	Cell Signaling	12238	1:1000	1:1000
GFAP	Dako	70334	1:5000	N/A
CD68	AbD Serotec	MCA1957	1:2000	N/A
ATG9a	Cell Signaling Technology	13509S	N/A	1:1000
TFRC	Thermo-Fisher	13-6800	N/A	1:1000
p62	Cell Signaling Technology	5114S	N/A	1:1000
LC3B	Cell Signaling Technology	3868	N/A	1:1000
Synaptophysin 1	Synaptic Systems	101308	1:2000	N/A
IBA1	Synaptic Systems	HS-234 017	1:1000	N/A
GFAP	Synaptic Systems	173308	1:1000	N/A
Bassoon	Synaptic Systems	141119	1:1000	N/A

## Sheet: Primers
Primer name	Sequence
Wdr45 N-Term Seq fwd	TCAGAGAGGACACTGGGGAA
Wdr45 N-Term Seq rev	CTACCTGCTCGTGGTCTGGA
Wdr45 qPCR fwd	CATCTTGACCACGAGCAGGT
Wdr45 qPCR rev	GAAGGTGAACTCCAGCACCA
Gapdh qPCR fwd	ACCACAGTCCATGCCATCAC
Gapdh qPCR rev	TCCACCACCCTGTTGCTGTA

## Sheet: CRISPR reagents
Reagent	Sequence	IDT Name
Wdr45C>T c52 crRNA	UCAUAAGCUUACUUUGGUCU	Mm.HC9.DTKT6580.AA
Wdr45C>T c52 HDR Template	AGCCACTTCGAGGTGTGACCAGCCTACATTTCAACCAAGACTAAAGTAAGCTTATGATTGTGTCTTTGTGGGAAAGAAGGAA	CD.HC9.BXMV8514
